# Supplementary material
Source: PubMed Central journal article supplement (PMC196877)
Supplement: pnas_100_19_10764__1.pdf [file pnas_100_19_10764__1.pdf]

## Supporting Text

**Strain Construction.** All gene constructs were transformed into the genome by PCR-based gene integration, and were confirmed by PCR and Western blot (1). CFP was inserted in between residues 10 and 11 of Gpa1p (HIS5-marked vector) and YFP was inserted in between residues 104 and 105 of Ste18p (kanamycin-marked vector) by PCR-based gene integration of RJD415 to create the FRET strain TMY101. The singly labeled strains TMY102 (*CFP-GPA1*) and TMY103 (*STE18-YFP*) contained only one of the two FRET probes. The *sst2* $\Delta$  strain TMY91 was constructed by PCR-based gene disruption of the strain RJD360. In the strain TMY92 (*ste2*<sup>300 $\Delta$</sup> ), we inserted a stop codon after amino acid 300 in the *STE2* gene of RJD415 by using PCR-based gene insertion. We crossed TMY91 with TMY101 to place the *sst2* $\Delta$  mutation into the FRET background (TMY111). We crossed TMY92 with TMY101 to place the *ste2*<sup>300 $\Delta$</sup>  mutation into the FRET background (TMY112). One of the sporulation products from the TMY91  $\times$  TMY101 cross, TMY113, contained the wild-type genes for both *SST2* and *BARI*, along with *CFP-GPA1* and *STE18-YFP*. See Table 2 for genotypes of strains.

**Ligand-Binding and Receptor Endocytosis Assays.** Ligand-binding assays were performed with <sup>35</sup>S-labeled  $\alpha$ -factor and whole cells in YPAD medium (pH 6.4) treated with 10 mM NaN<sub>3</sub> and 10 mM NaF (2). The  $\alpha$ -factor internalization assays were performed essentially as described (3).

**Additional Notes on FRET Quantification.** The FRET efficiencies in the absence of  $\alpha$ -factor,  $E_0$  ( $t = 0$ ), and when G protein activation was at its maximum,  $E_{max}$  ( $t = 30$ s), were

$$E_0 = 1 - \frac{F_{DA}^0}{F_D^0} \quad \text{and} \quad E_{max} = 1 - \frac{F_{DA}^{max}}{F_D^{max}},$$

determined by using the following formulas:

where  $F_{DA}$  is the fluorescence emission of the donor CFP-Gpa1p in the presence of the FRET acceptor Ste18p-YFP, and  $F_D$  is the emission of CFP-Gpa1p alone.

For TMY111,  $r_0 = 0.63$ , and  $r_{\max} = 0.7$ ; for TMY112,  $r_0 = 0.59$  and  $r_{\max} = 0.67$ . We could not calculate  $E_0$  and  $E_{\max}$  for these two strains, because we did not have singly labeled CFP-Gpa1p versions of the strains to determine  $F_D$ .

Background subtraction (subtracting the intrinsic background fluorescence of yeast cells) was not necessary for the raw 475/530 ratios,  $r_i$ , because we were quantitating changes in  $r_i$ . Background subtraction was performed on the representative spectra in Fig. 2 and for the determination of  $E_0$  and  $E_{\max}$ .

The fluorescence emission of CFP-Gpa1p alone and Ste18p-YFP alone did not change significantly during the first 10 min of the pheromone response.

**Additional Notes on Parameter Estimation.** Siekhaus and Drubin (4) have recently demonstrated that *sst2* $\Delta$  cells exhibit spontaneous receptor-independent G protein activation. For the modeling described above, we have assumed that the *sst2* $\Delta$  cells in the absence of pheromone are either fully activated in terms of G protein signaling or completely inactive. Only the inactive class of cells responds to  $\alpha$ -factor; the active class contributes to a higher pretreatment baseline level of G protein activation.

1. Wach, A. (1996) *Yeast* **12**, 259–265.
2. Blumer, K. J. & Thorner, J. (1990) *Proc. Natl. Acad. Sci. USA* **87**, 4363–4367.
3. Hicke, L. & Riezmann, H. (1996) *Cell* **84**, 277–287.
4. Siekhaus, D. E. & Drubin, D. G. (2003) *Nat. Cell Biol.* **5**, 231–235.
